# Supplementary material
Source: HighWire-hosted journal article supplement (http://heart.bmj.com/highwire/filestream/125262/field_highwire_adjunct_files/0/Heart_204222_Appendix.docx)
Supplement: Heart_204222_Appendix.docx [file Heart_204222_Appendix.docx]

**Appendix**

**Organ specific data for equivalent dose and fatal cancer risk for simple procedures performed before and after dose reduction maneuvers (DRM). The calculated error for organ doses was <0.4% for all organs except for the ovaries, which had an error <14%.**

|  | **Organ equivalent dose (mSv)** | |  | **Organ-specific fatal cancer probability per mSv (x10-6)** |  | **Fatal malignancy risk (x10-6)** | |
| --- | --- | --- | --- | --- | --- | --- | --- |
|  | **Pre DRM** | **Post DRM** |  |  |  | **Pre DRM** | **Post DRM** |
|  |  |  |  |  |  |  |  |
| Lungs | 14.45 | 5.66 |  | 6.600 |  | 95.37 | 37.38 |
| Esophagus | 9.78 | 3.44 |  | 2.200 |  | 21.52 | 7.57 |
| Breasts | 1.52 | 0.53 |  | 6.600 |  | 10.03 | 3.49 |
| Stomach | 1.19 | 0.40 |  | 6.600 |  | 7.87 | 2.62 |
| Heart | 15.34 | 5.56 |  | 0.473 |  | 7.26 | 2.63 |
| Liver | 2.84 | 1.07 |  | 2.200 |  | 6.25 | 2.35 |
| Skeleton | 5.71 | 2.24 |  | 0.550 |  | 3.14 | 1.23 |
| Thymus | 4.91 | 1.75 |  | 0.473 |  | 2.32 | 0.83 |
| Adrenals | 4.60 | 1.66 |  | 0.473 |  | 2.18 | 0.78 |
| Pancreas | 2.37 | 0.81 |  | 0.473 |  | 1.12 | 0.38 |
| Muscle | 1.94 | 0.73 |  | 0.473 |  | 0.92 | 0.35 |
| Skin | 1.51 | 0.60 |  | 0.550 |  | 0.83 | 0.33 |
| Spleen | 1.39 | 0.46 |  | 0.473 |  | 0.66 | 0.22 |
| Kidneys | 0.70 | 0.24 |  | 0.473 |  | 0.33 | 0.11 |
| Gall bladder | 0.70 | 0.24 |  | 0.473 |  | 0.33 | 0.11 |
| Ovaries | 0.014 | 0.003 |  | 4.400 |  | 0.063 | 0.014 |

**Organ specific data for equivalent dose and fatal cancer risk for complex procedures performed before and after dose reduction maneuvers (DRM). The calculated error for organ doses was <0.4% for all organs except for the ovaries, which had an error <14%.**

|  | **Organ equivalent dose (mSv)** | |  | **Organ-specific fatal cancer probability per mSv (x10-6)** |  | **Fatal malignancy risk (x10-6)** | |
| --- | --- | --- | --- | --- | --- | --- | --- |
|  | **Pre DRM** | **Post DRM** |  |  |  | **Pre DRM** | **Post DRM** |
|  |  |  |  |  |  |  |  |
| Lungs | 31.59 | 11.87 |  | 6.600 |  | 208.49 | 78.34 |
| Bone marrow | 9.66 | 3.18 |  | 6.600 |  | 63.78 | 20.96 |
| Esophagus | 26.69 | 8.76 |  | 2.200 |  | 58.72 | 19.28 |
| Breasts | 3.64 | 1.21 |  | 6.600 |  | 24.04 | 7.99 |
| Stomach | 3.12 | 1.06 |  | 6.600 |  | 20.62 | 7.00 |
| Heart | 39.07 | 13.41 |  | 0.473 |  | 18.48 | 6.34 |
| Liver | 6.41 | 2.15 |  | 2.200 |  | 14.10 | 4.73 |
| Skeleton | 16.35 | 5.86 |  | 0.550 |  | 8.99 | 3.22 |
| Thymus | 11.09 | 3.73 |  | 0.473 |  | 5.25 | 1.76 |
| Adrenals | 13.00 | 4.25 |  | 0.473 |  | 6.15 | 2.01 |
| Pancreas | 6.25 | 2.06 |  | 0.473 |  | 2.96 | 0.97 |
| Muscle | 5.13 | 1.81 |  | 0.473 |  | 2.43 | 0.85 |
| Skin | 3.88 | 1.45 |  | 0.550 |  | 2.14 | 0.80 |
| Spleen | 3.73 | 1.34 |  | 0.473 |  | 1.76 | 0.64 |
| Kidneys | 1.81 | 0.57 |  | 0.473 |  | 0.86 | 0.27 |
| Gall bladder | 1.67 | 0.52 |  | 0.473 |  | 0.79 | 0.24 |
| Ovaries | 0.036 | 0.007 |  | 4.400 |  | 0.157 | 0.031 |
